# Supplementary material for: Spatial epidemiology and climatic predictors of paediatric dengue infections captured via sentinel site surveillance, Phnom Penh Cambodia 2011–2012
Source: PubMed Central journal article supplement (PMC4085229; doi:10.1186/1471-2458-14-658), 2014-06-28
Supplement: 1471-2458-14-658-S1.pdf [file 1471-2458-14-658-S1.pdf]

## Supplemental Information

Spatial epidemiology and climatic predictors of paediatric dengue infections captured via sentinel site surveillance, Phnom Penh Cambodia 2011-2012

### Appendix

---

| variable                 | Lag period  | IRR  | 95% CI      | p value  |
|--------------------------|-------------|------|-------------|----------|
| Minimum temperature      | 1 week lag  | 1.13 | 1.05 - 1.20 | 0.00034  |
|                          | 2 week lag  | 1.12 | 1.05 - 1.20 | 0.0011   |
|                          | 3 week lag  | 1.16 | 1.09 - 1.23 | < 0.0001 |
|                          | 6 week lag  | 1.22 | 1.12 - 1.32 | < 0.0001 |
|                          | 9 week lag  | 1.18 | 1.13 - 1.23 | < 0.0001 |
|                          | 10 week lag | 1.12 | 1.06 - 1.19 | < 0.0001 |
|                          | 11 week lag | 1.12 | 1.06 - 1.18 | < 0.0001 |
| Median relative humidity | 1 week lag  | 1.04 | 1.02 - 1.05 | < 0.0001 |
|                          | 2 week lag  | 1.04 | 1.02 - 1.05 | 0.00020  |
|                          | 3 week lag  | 1.04 | 1.03 - 1.05 | < 0.0001 |
| Maximum rainfall         | 1 week lag  | 0.99 | 0.99 - 0.99 | < 0.0001 |
|                          | 2 week lag  | 0.99 | 0.98 - 0.99 | < 0.0001 |
|                          | 3 week lag  | 0.99 | 0.98 - 0.99 | < 0.0001 |
|                          | 4 week lag  | 0.99 | 0.99 - 0.99 | < 0.0001 |
|                          | 5 week lag  | 0.99 | 0.99 - 0.99 | 0.016    |
|                          | 10 week lag | 0.99 | 0.99 - 0.99 | 0.014    |
|                          | 12 week lag | 0.99 | 0.99 - 0.99 | 0.015    |

---

**Appendix figure 1.** Time series negative binomial regression for reported national dengue cases, Cambodia, Dec 2010- Dec. 2012.

Note: IRR = incidence rate ratio
